# Supplementary material
Source: HighWire-hosted journal article supplement (https://www.annals.org/content/suppl/2006/07/27/0000605-200609050-00135v1)
Supplement: 0000605-200609050-00135_AT1.pdf [file 0000605-200609050-00135_AT1.pdf]

Appendix Table 1. Efficacy of Multivitamin and Mineral Supplement Use in Primary Prevention of Cancer\*

| Study (Reference)                     | Disease End Point           | Study Supplement†                    | Participants, n‡ |                                      |                                         | Disease Events, n‡ |                                      |                                         | Unadjusted Relative Risk (95% CI) | Unadjusted Odds Ratio (95% CI) | Comments |
|---------------------------------------|-----------------------------|--------------------------------------|------------------|--------------------------------------|-----------------------------------------|--------------------|--------------------------------------|-----------------------------------------|-----------------------------------|--------------------------------|----------|
|                                       |                             |                                      | Total            | Supplements with Specified Nutrients | Supplements without Specified Nutrients | Total              | Supplements with Specified Nutrients | Supplements without Specified Nutrients |                                   |                                |          |
| Linxian General Population Trial (18) | Total cancer incidence      | Retinol + zinc                       | 29 584           | –                                    | –                                       | 1298               | –                                    | –                                       | 1.00 (0.89–1.11)                  | –                              |          |
|                                       |                             | Riboflavin + niacin                  |                  |                                      |                                         |                    |                                      |                                         | 0.95 (0.85–1.06)                  | –                              |          |
|                                       |                             | Vitamin C + molybdenum               |                  |                                      |                                         |                    |                                      |                                         | 1.06 (0.95–1.18)                  | –                              |          |
|                                       |                             | β-Carotene + selenium + α-tocopherol |                  |                                      |                                         |                    |                                      |                                         | 0.93 (0.83–1.03)                  | –                              |          |
|                                       | Gastric cancer incidence    | Retinol + zinc                       | 29 584           | –                                    | –                                       | 539                | –                                    | –                                       | 0.96 (0.81–1.14)                  | –                              |          |
|                                       |                             | Riboflavin + niacin                  |                  |                                      |                                         |                    |                                      |                                         | 1.04 (0.88–1.23)                  | –                              |          |
|                                       |                             | Vitamin C + molybdenum               |                  |                                      |                                         |                    |                                      |                                         | 1.10 (0.92–1.30)                  | –                              |          |
|                                       |                             | β-Carotene + selenium + α-tocopherol |                  |                                      |                                         |                    |                                      |                                         | 0.84 (0.71–1.00)                  | –                              |          |
|                                       | Esophageal cancer incidence | Retinol + zinc                       | 29 584           | –                                    | –                                       | 640                | –                                    | –                                       | 1.07 (0.92–1.25)                  | –                              |          |
|                                       |                             | Riboflavin + niacin                  |                  |                                      |                                         |                    | –                                    | –                                       | 0.86 (0.74–1.01)                  | –                              |          |
|                                       |                             | Vitamin C + molybdenum               |                  |                                      |                                         |                    | –                                    | –                                       | 1.06 (0.91–1.24)                  | –                              |          |
|                                       |                             | β-Carotene + selenium + α-tocopherol |                  |                                      |                                         |                    | –                                    | –                                       | 1.02 (0.87–1.19)                  | –                              |          |

|                                              |                                             |        |   |   |      |   |   |                      |   |
|----------------------------------------------|---------------------------------------------|--------|---|---|------|---|---|----------------------|---|
| Esophageal/<br>cardia<br>cancer<br>incidence | Retinol + zinc                              | 29 584 | – | – | 1075 | – | – | 1.05 (0.93–<br>1.19) | – |
|                                              | Riboflavin +<br>niacin                      |        |   |   |      |   |   | 0.94 (0.83–<br>1.06) | – |
|                                              | Vitamin C +<br>molybdenum                   |        |   |   |      |   |   | 1.06 (0.94–<br>1.20) | – |
|                                              | β-Carotene +<br>selenium + α-<br>tocopherol |        |   |   |      |   |   | 0.94 (0.84–<br>1.06) | – |
| Total cancer<br>death                        | Retinol + zinc                              | 29 584 | – | – | 792  | – | – | 0.97 (0.85–<br>1.12) | – |
|                                              | Riboflavin +<br>niacin                      |        |   |   |      |   |   | 0.98 (0.85–<br>1.13) | – |
|                                              | Vitamin C +<br>molybdenum                   |        |   |   |      |   |   | 1.06 (0.92–<br>1.21) | – |
|                                              | β-Carotene +<br>selenium + α-<br>tocopherol |        |   |   |      |   |   | 0.87 (0.75–<br>1.00) | – |
| Stomach<br>cancer death                      | Retinol + zinc                              | 29 584 | – | – | 331  | – | – | 1.03 (0.83–<br>1.28) | – |
|                                              | Riboflavin +<br>niacin                      |        |   |   |      |   |   | 1.00 (0.81–<br>1.24) | – |
|                                              | Vitamin C +<br>molybdenum                   |        |   |   |      |   |   | 1.09 (0.88–<br>1.36) | – |
|                                              | β-Carotene +<br>selenium + α-<br>tocopherol |        |   |   |      |   |   | 0.79 (0.64–<br>0.99) | – |
| Esophageal<br>cancer death                   | Retinol + zinc                              | 29 584 | – | – | 360  | – | – | 0.93 (0.76–<br>1.15) | – |
|                                              | Riboflavin +<br>niacin                      |        |   |   |      |   |   | 0.90 (0.73–<br>1.11) | – |
|                                              | Vitamin C +<br>molybdenum                   |        |   |   |      |   |   | 1.05 (0.85–<br>1.29) | – |
|                                              | β-Carotene +<br>selenium + α-<br>tocopherol |        |   |   |      |   |   | 0.96 (0.78–<br>1.18) | – |

|                                                                                         |                                                      |                                             |        |     |     |           |    |    |                      |                      |                                                       |
|-----------------------------------------------------------------------------------------|------------------------------------------------------|---------------------------------------------|--------|-----|-----|-----------|----|----|----------------------|----------------------|-------------------------------------------------------|
|                                                                                         | Esophageal/<br>gastric<br>cardia<br>cancer death     | Retinol + zinc                              | 29 584 | –   | –   | 613       | –  | –  | 1.04 (0.89–<br>1.22) | –                    |                                                       |
|                                                                                         |                                                      | Riboflavin +<br>niacin                      |        |     |     |           |    |    | 0.95 (0.81–<br>1.11) | –                    |                                                       |
|                                                                                         |                                                      | Vitamin C +<br>molybdenum                   |        |     |     |           |    |    | 1.06 (0.90–<br>1.24) | –                    |                                                       |
|                                                                                         |                                                      | β-Carotene +<br>selenium + α-<br>tocopherol |        |     |     |           |    |    | 0.90 (0.77–<br>1.05) | –                    |                                                       |
| Linxian<br>General<br>Population<br>Trial: end-of-<br>trial<br>endoscopy<br>survey (20) | Esophageal<br>and gastric<br>cancer and<br>dysplasia | Retinol + zinc                              | 391    | 197 | 194 | <b>60</b> | 28 | 32 | –                    | 0.83 (0.47–<br>1.46) | Adjusted for age,<br>sex, smoking,<br>and alcohol use |
|                                                                                         |                                                      | Riboflavin +<br>niacin                      |        | 194 | 197 |           | 34 | 26 | –                    | 1.39 (0.79–<br>2.44) | Adjusted for age,<br>sex, smoking,<br>and alcohol use |
|                                                                                         |                                                      | Vitamin C +<br>molybdenum                   |        | 206 | 185 |           | 37 | 23 | –                    | 1.61 (0.91–<br>2.86) | Adjusted for age,<br>sex, smoking,<br>and alcohol use |
|                                                                                         |                                                      | β-Carotene +<br>selenium + α-<br>tocopherol |        | 177 | 214 |           | 25 | 35 | –                    | 0.83 (0.47–<br>1.46) | Adjusted for age,<br>sex, smoking,<br>and alcohol use |
|                                                                                         | Esophageal<br>and gastric<br>cancer                  | Retinol + zinc                              | 391    | 197 | 194 | 31        | 13 | 18 | –                    | 0.61 (0.29–<br>1.31) |                                                       |
|                                                                                         |                                                      | Riboflavin +<br>niacin                      |        | 194 | 197 |           | 18 | 13 | –                    | 1.46 (0.68–<br>3.11) |                                                       |
|                                                                                         |                                                      | Vitamin C +<br>molybdenum                   |        | 206 | 185 |           | 21 | 10 | –                    | 1.99 (0.90–<br>4.41) |                                                       |
|                                                                                         |                                                      | β-Carotene +<br>selenium + α-<br>tocopherol |        | 177 | 214 |           | 12 | 19 | –                    | 0.79 (0.36–<br>1.69) |                                                       |

|                |                           |                                                             |        |      |      |     |     |     |                               |   |                                                                      |
|----------------|---------------------------|-------------------------------------------------------------|--------|------|------|-----|-----|-----|-------------------------------|---|----------------------------------------------------------------------|
| SU.VI.MAX (23) | Cancer incidence          | Vitamin C + vitamin E + $\beta$ -carotene + selenium + zinc | 12 741 | 6364 | 6377 | 562 | 267 | 295 | 0.90 (0.76–1.06)              | – | <i>P</i> = 0.02 for the interaction between sex and randomized group |
|                | Women only                |                                                             | 7713   | 3844 | 3869 | 350 | 179 | 171 | 1.04 (0.85–1.29)              | – |                                                                      |
|                | Men only                  |                                                             | 5028   | 2520 | 2508 | 212 | 88  | 124 | 0.69 (0.53–0.91) <sup>§</sup> | – |                                                                      |
| SU.VI.MAX (24) | Prostate cancer incidence | Vitamin C + vitamin E + $\beta$ -carotene + selenium + zinc | 5034   | 2522 | 2512 | 103 | 49  | 54  | 0.88 (0.60–1.29)              | – | Men only                                                             |
|                |                           |                                                             | 4563   | 2293 | 2270 | 51  | 18  | 33  | 0.52 (0.29–0.92) <sup>§</sup> | – | In men with initial PSA level < 3.0 $\mu$ g/L                        |
|                |                           |                                                             | 292    | 149  | 143  | 50  | 31  | 19  | 1.54 (0.87–2.72)              | – | In men with initial PSA level $\geq$ 3.0 $\mu$ g/L                   |

\* – = not reported; PSA = prostate-specific antigen; SU.VI.MAX = SUplémentation en Vitamines et Minéraux AntioXydants.

†Unless otherwise specified, comparisons were made between groups receiving the combination of the listed nutrients and the groups receiving combinations of placebo or nutrients other than the nutrients listed.

‡The total number is presented (when available) if the number in each comparison group was not reported.

§*P* < 0.01.
