# Supplementary material
Source: HighWire-hosted journal article supplement (https://www.annals.org/content/suppl/2006/07/27/0000605-200609050-00135v1)
Supplement: 0000605-200609050-00135_AT2.pdf [file 0000605-200609050-00135_AT2.pdf]

|              |                                                                   |         |   |   |   |   |   |   |   |   |   |                                               |   |
|--------------|-------------------------------------------------------------------|---------|---|---|---|---|---|---|---|---|---|-----------------------------------------------|---|
|              | Vitamin C + molybdenum                                            |         |   |   |   |   |   |   |   |   |   | 1.04 (0.88–1.24)                              | – |
|              | β-Carotene + selenium + α-tocopherol                              |         |   |   |   |   |   |   |   |   |   | 0.91 (0.76–1.07)                              | – |
| Hypertension | Retinol + zinc + riboflavin + niacin vs. placebo                  | 29 584† | – | – | – | – | – | – | – | – | – | Isolated systolic: 1.08 (0.85–1.38)           | – |
|              |                                                                   |         |   |   |   |   |   |   |   |   |   | Isolated diastolic: 0.94 (0.70–1.26)          | – |
|              |                                                                   |         |   |   |   |   |   |   |   |   |   | Both systolic and diastolic: 1.08 (0.87–1.35) | – |
|              | Retinol + zinc + vitamin C + molybdenum vs. placebo               |         |   |   | – | – | – | – | – | – | – | Isolated systolic: 1.11 (0.88–1.41)           | – |
|              |                                                                   |         |   |   |   |   |   |   |   |   |   | Isolated diastolic: 0.94 (0.70–1.26)          | – |
|              |                                                                   |         |   |   |   |   |   |   |   |   |   | Both systolic and diastolic: 0.93 (0.74–1.16) | – |
|              | Retinol + zinc + β-carotene + selenium + α-tocopherol vs. placebo |         |   |   | – | – | – | – | – | – | – | Isolated systolic: 1.07 (0.85–1.36)           | – |
|              |                                                                   |         |   |   |   |   |   |   |   |   |   | Isolated diastolic: 1.23 (0.93–1.62)          | – |
|              |                                                                   |         |   |   |   |   |   |   |   |   |   | Both systolic and diastolic: 1.01 (0.81–1.26) | – |
|              | Riboflavin + niacin + vitamin C + molybdenum vs. placebo          |         |   |   | – | – | – | – | – | – | – | Isolated systolic: 0.96 (0.76–1.22)           | – |
|              |                                                                   |         |   |   |   |   |   |   |   |   |   | Isolated diastolic: 0.68 (0.50–0.94)          | – |
|              |                                                                   |         |   |   |   |   |   |   |   |   |   | Both systolic and diastolic: 0.92 (0.74–1.15) | – |

|  |                                                                                                                  |   |   |   |   |   |   |   |   |                                               |   |
|--|------------------------------------------------------------------------------------------------------------------|---|---|---|---|---|---|---|---|-----------------------------------------------|---|
|  | Riboflavin + niacin + β-carotene + selenium + α-tocopherol vs. placebo                                           | - | - | - | - | - | - | - | - | Isolated systolic: 0.98 (0.77–1.25)           | - |
|  |                                                                                                                  |   |   |   |   |   |   |   |   | Isolated diastolic: 0.90 (0.67–1.22)          | - |
|  |                                                                                                                  |   |   |   |   |   |   |   |   | Both systolic and diastolic: 1.03 (0.82–1.28) | - |
|  | Vitamin C + molybdenum + β-carotene + selenium + α-tocopherol vs. placebo                                        | - | - | - | - | - | - | - | - | Isolated systolic: 0.93 (0.73–1.19)           | - |
|  |                                                                                                                  |   |   |   |   |   |   |   |   | Isolated diastolic: 1.13 (0.86–1.50)          | - |
|  |                                                                                                                  |   |   |   |   |   |   |   |   | Both systolic and diastolic: 0.85 (0.67–1.06) | - |
|  | Retinol + zinc + riboflavin + niacin + vitamin C + molybdenum + β-carotene + selenium + α-tocopherol vs. placebo | - | - | - | - | - | - | - | - | Isolated systolic: 0.91 (0.71–1.16)           | - |
|  |                                                                                                                  |   |   |   |   |   |   |   |   | Isolated diastolic: 1.10 (0.84–1.47)          | - |
|  |                                                                                                                  |   |   |   |   |   |   |   |   | Both systolic and diastolic: 0.97 (0.77–1.20) | - |
|  | Retinol + zinc                                                                                                   | - | - | - | - | - | - | - | - | Isolated systolic: 1.07 (0.96–1.21)           | - |
|  |                                                                                                                  |   |   |   |   |   |   |   |   | Isolated diastolic: 1.13 (0.98–1.31)          | - |
|  |                                                                                                                  |   |   |   |   |   |   |   |   | Both systolic and diastolic: 1.05 (0.94–1.18) | - |
|  | Riboflavin + niacin                                                                                              | - | - | - | - | - | - | - | - | Isolated systolic: 0.95 (0.85–1.08)           | - |

|                |                                           |                                                                  |       |      |      |     |     |   |   |              |              |                                               |                  |
|----------------|-------------------------------------------|------------------------------------------------------------------|-------|------|------|-----|-----|---|---|--------------|--------------|-----------------------------------------------|------------------|
|                |                                           |                                                                  |       |      |      |     |     |   |   |              |              | Isolated diastolic: 0.84 (0.73–0.98)          | –                |
|                |                                           |                                                                  |       |      |      |     |     |   |   |              |              | Both systolic and diastolic: 1.05 (0.94–1.18) | –                |
|                | Vitamin C + molybdenum                    |                                                                  |       |      |      |     |     |   |   |              |              | Isolated systolic: 0.94 (0.84–1.07)           | –                |
|                |                                           |                                                                  |       |      |      |     |     |   |   |              |              | Isolated diastolic: 0.95 (0.82–1.10)          | –                |
|                |                                           |                                                                  |       |      |      |     |     |   |   |              |              | Both systolic and diastolic: 0.89 (0.79–0.99) | –                |
|                | β-Carotene + selenium + α-tocopherol      |                                                                  |       |      |      |     |     |   |   |              |              | Isolated systolic: 0.93 (0.83–1.05)           | –                |
|                |                                           |                                                                  |       |      |      |     |     |   |   |              |              | Isolated diastolic: 1.23 (1.06–1.42)          | –                |
|                |                                           |                                                                  |       |      |      |     |     |   |   |              |              | Both systolic and diastolic: 0.98 (0.87–1.09) | –                |
| SU.VI.MAX (23) | Ischemic cardiovascular disease incidence | Vitamin C + vitamin E + β-carotene + selenium + zinc vs. placebo |       | 6364 | 6377 | 134 | 137 | – | – | –            | –            | 0.97 (0.77–1.20)                              | –                |
| SU.VI.MAX (25) | Hypertension†                             | Vitamin C + vitamin E + β-carotene + selenium + zinc vs. placebo | Women | 1502 | 1431 | –   | –   | – | – | Year 1: 19.4 | Year 1: 20.8 | –                                             | 1.10 (0.95–1.29) |
|                |                                           |                                                                  | Men   | 1117 | 1431 | –   | –   | – | – | Year 6: 34.6 | Year 6: 32.4 | –                                             | 1.04 (0.87–1.23) |
|                |                                           |                                                                  |       |      |      |     |     |   |   | Year 1: 44.7 | Year 1: 42.0 | –                                             |                  |
|                |                                           |                                                                  |       |      |      |     |     |   |   | Year 6: 54.6 | Year 6: 53.8 | –                                             |                  |

\* Comparisons were made between the groups receiving the combination of the listed nutrients and groups receiving combinations of placebo or nutrients other than the nutrients listed. – = not reported; SU.VI.MAX= Supplémentation en Vitamines et Minéraux AntioXydants.

† The number of participants in each randomized group was not reported.

‡ Defined as systolic blood pressure ≥ 140 mm Hg, diastolic blood pressure ≥ 90 mm Hg, or antihypertensive drug use at the end of the study.
