# Supplementary material
Source: HighWire-hosted journal article supplement (https://www.annals.org/content/suppl/2006/07/27/0000605-200609050-00135v1)
Supplement: 0000605-200609050-00135_AT3.pdf [file 0000605-200609050-00135_AT3.pdf]

Appendix Table 3. Efficacy of Multivitamin and Mineral Supplement Use in Primary Prevention of Cataracts and Age-Related Macular Degeneration\*

| Study (Reference)                                | Disease End Point                    | Study Supplement†                             | Participants, n‡ |                                               |                                                  |                  | Disease Events, n‡                            |                                                  |                                               | Prevalence of Disease End Point                  |                                                                                                             | Unadjusted Odds Ratio (95% or 99% CI) § | Change in Outcome Measure |   | Comment |
|--------------------------------------------------|--------------------------------------|-----------------------------------------------|------------------|-----------------------------------------------|--------------------------------------------------|------------------|-----------------------------------------------|--------------------------------------------------|-----------------------------------------------|--------------------------------------------------|-------------------------------------------------------------------------------------------------------------|-----------------------------------------|---------------------------|---|---------|
|                                                  |                                      |                                               | Total            | Received Supplements with Specified Nutrients | Received Supplements without Specified Nutrients | All Participants | Received Supplements with Specified Nutrients | Received Supplements without Specified Nutrients | Received Supplements with Specified Nutrients | Received Supplements without Specified Nutrients | Treatment Group                                                                                             |                                         | Placebo Group             |   |         |
| Linxian General Population Trial: cataracts (22) | Prevalence of nuclear cataracts      | Retinol + zinc                                | 3249             | 1628                                          | 1621                                             | –                | –                                             | –                                                | 0.120                                         | 0.151                                            | 0.77 (0.58–1.02)                                                                                            | –                                       | –                         |   |         |
|                                                  |                                      | Riboflavin + niacin                           |                  | 1623                                          | 1626                                             | –                | –                                             | –                                                | 0.107                                         | 0.169                                            | Overall, 0.59 (0.45–0.79); 0.99 (0.62–1.59) in persons age 55–64 y; 0.45 (0.31–0.64) in persons age 65–74 y | –                                       | –                         |   |         |
|                                                  |                                      | Vitamin C + molybdenum                        |                  | 1654                                          | 1595                                             | –                | –                                             | –                                                | 0.121                                         | 0.150                                            |                                                                                                             | 0.78 (0.59–1.04)                        | –                         | – |         |
|                                                  | β-Carotene + selenium + α-tocopherol |                                               | 1617             | 1632                                          | –                                                | –                | –                                             | 0.146                                            | 0.125                                         | 1.19 (0.90–1.59)                                 |                                                                                                             | –                                       | –                         |   |         |
|                                                  | Prevalence of cortical cataracts     | Retinol + zinc                                |                  | 1628                                          | 1621                                             | –                | –                                             | –                                                | 0.342                                         | 0.325                                            | 1.08 (0.92–1.27)                                                                                            | –                                       | –                         |   |         |
|                                                  |                                      | Riboflavin + niacin                           |                  | 1623                                          | 1626                                             | –                | –                                             | –                                                | 0.342                                         | 0.325                                            | 1.08 (0.92–1.27)                                                                                            | –                                       | –                         |   |         |
|                                                  |                                      | Vitamin C + molybdenum                        |                  | 1654                                          | 1595                                             | –                | –                                             | –                                                | 0.325                                         | 0.342                                            | 0.92 (0.79–1.09)                                                                                            | –                                       | –                         |   |         |
|                                                  |                                      | β-Carotene + selenium + α-tocopherol          |                  | 1617                                          | 1632                                             | –                | –                                             | –                                                | 0.330                                         | 0.338                                            | 0.96 (0.82–1.13)                                                                                            | –                                       | –                         |   |         |
|                                                  |                                      | Prevalence of posterior subcapsular cataracts | Retinol + zinc   |                                               | 1628                                             | 1621             | –                                             | –                                                | –                                             | 0.008                                            | 0.013                                                                                                       | 0.59 (0.31–1.14)                        | –                         | – |         |
| Riboflavin + niacin                              |                                      |                                               |                  | 1623                                          | 1626                                             | –                | –                                             | –                                                | 0.016                                         | 0.006                                            | 2.64 (1.31–5.35)                                                                                            | –                                       | –                         |   |         |
| Vitamin C + molybdenum                           |                                      |                                               | 1654             | 1595                                          | –                                                | –                | –                                             | 0.011                                            | 0.009                                         | 1.25 (0.65–2.38)                                 | –                                                                                                           | –                                       |                           |   |         |
|                                                  | β-Carotene + selenium + α-tocopherol |                                               | 1617             | 1632                                          | –                                                | –                | –                                             | 0.013                                            | 0.008                                         | 1.56 (0.81–3.00)                                 | –                                                                                                           | –                                       |                           |   |         |

|                      |                                                      |                                                                                                                                                 |      |      |      |      |     |     |   |   |                  |   |                                                                              |                                                                            |                                                                                                                                                                                                                                                                                           |
|----------------------|------------------------------------------------------|-------------------------------------------------------------------------------------------------------------------------------------------------|------|------|------|------|-----|-----|---|---|------------------|---|------------------------------------------------------------------------------|----------------------------------------------------------------------------|-------------------------------------------------------------------------------------------------------------------------------------------------------------------------------------------------------------------------------------------------------------------------------------------|
| MONMD (26)           | Acuity of left eyes, distance visual acuity [logMAR] | β-Carotene + vitamin E + vitamin C + zinc picolinate + selenium + vitamin B <sub>2</sub> + chromium + non-vitamin/mineral nutrients vs. placebo | 71   | 39   | 32   | –    | –   | –   | – | – | –                | – | From 0.17 to 0.19 logMAR                                                     | From 0.26 to 0.35 logMAR                                                   | No difference between randomized groups in refraction, metamorphosis, and Lens Opacities Classification System II readings on nuclear color, nuclear opalescence, and posterior subcapsular opacities; unexpected cortical cataractogenic effect for right eyes in the multivitamin group |
|                      | Acuity of left eyes, near visual acuity [M print]    |                                                                                                                                                 | 71   | 39   | 32   | –    | –   | –   | – | – | –                | – | From 0.77 M to 0.89 M¶                                                       | From 1.29 M to 2.03 M                                                      |                                                                                                                                                                                                                                                                                           |
| REACT (27)           | Anterior percentage pixel opaque (primary end point) | β-Carotene + vitamin C + <i>all-rac</i> α-tocopherol vs. placebo                                                                                | 158  | 81   | 77   | –    | –   | –   | – | – | –                | – | Baseline, 5.7 ± 1.6, last, 7.3 ± 2.0; mean change from baseline, 1.7 ± 1.0** | Baseline, 5.0 ± 1.4; last, 8.3 ± 2.2; mean change from baseline, 3.3 ± 1.4 | Unfavorable changes in secondary outcomes were smaller in the active supplement group, but none was significantly different from placebo group.                                                                                                                                           |
| AREDS: cataract (28) | Total lens events                                    | Vitamin C + vitamin E + β-carotene                                                                                                              | 4596 | 2286 | 2310 | 1541 | 756 | 785 | – | – | 0.97 (0.84–1.11) | – | –                                                                            | –                                                                          | Adjustments for several potential confounders did not materially alter results                                                                                                                                                                                                            |
|                      | Cataract surgery                                     |                                                                                                                                                 | 4596 | 2286 | 2310 | 675  | –   | –   | – | – | 0.94 (0.77–1.14) | – | –                                                                            | –                                                                          |                                                                                                                                                                                                                                                                                           |
|                      | Severe lens event                                    |                                                                                                                                                 | 4596 | 2286 | 2310 | 991  | –   | –   | – | – | 0.92 (0.76–1.12) | – | –                                                                            | –                                                                          |                                                                                                                                                                                                                                                                                           |
|                      | Nuclear event                                        | Vitamin C + vitamin E + β-carotene                                                                                                              | 4331 | –    | –    | 1674 | –   | –   | – | – | 0.98 (0.84–1.14) | – | –                                                                            | –                                                                          |                                                                                                                                                                                                                                                                                           |
|                      |                                                      | Vitamin C + vitamin E + β-carotene vs. placebo                                                                                                  | 2715 | –    | –    | 1027 | –   | –   | – | – | 1.00 (0.82–1.22) | – | –                                                                            | –                                                                          |                                                                                                                                                                                                                                                                                           |
|                      | Cortical event                                       | Vitamin C + vitamin E + β-carotene                                                                                                              | 4329 | –    | –    | 1058 | –   | –   | – | – | 0.99 (0.82–1.19) | – | –                                                                            | –                                                                          |                                                                                                                                                                                                                                                                                           |

|                                              |                                                                                                                                  |                                                                     |      |     |     |     |   |   |   |   |                    |   |   |                                                                                                                                                  |
|----------------------------------------------|----------------------------------------------------------------------------------------------------------------------------------|---------------------------------------------------------------------|------|-----|-----|-----|---|---|---|---|--------------------|---|---|--------------------------------------------------------------------------------------------------------------------------------------------------|
|                                              |                                                                                                                                  | Vitamin C + vitamin E + β-carotene vs. placebo                      | 2715 | –   | –   | 625 | – | – | – | – | 0.91 (0.71–1.15)   | – | – |                                                                                                                                                  |
|                                              | Posterior subcapsular event                                                                                                      | Vitamin C + vitamin E + β-carotene                                  | 4329 | –   | –   | 888 | – | – | – | – | 0.94 (0.78–1.14)   | – | – |                                                                                                                                                  |
|                                              |                                                                                                                                  | Vitamin C + vitamin E + β-carotene vs. placebo                      | 2715 | –   | –   | 535 | – | – | – | – | 0.91 (0.70–1.17)   | – | – |                                                                                                                                                  |
|                                              | Lens event in eyes without opacities                                                                                             | Vitamin C + vitamin E + β-carotene (comparison group not specified) | 823  | –   | –   | —   | – | – | – | – | 0.85 (0.55–1.33)   | – | – | Among those with no or minimal opacity in at least one eye at enrollment                                                                         |
|                                              | Loss of visual acuity score of 15 letters or more                                                                                | Vitamin C + vitamin E + β-carotene vs. placebo                      | –    | 537 | 580 | 172 | – | – | – | – | 1.03 (0.63–1.66)   | – | – | Among those without age-related macular degeneration at enrollment                                                                               |
| AREDS: age-related macular degeneration (29) | Progression to advanced age-related macular degeneration (among those in age-related macular degeneration categories 2, 3, or 4) | Vitamin C + vitamin E + β-carotene                                  | 3609 | –   | –   | 803 | – | – | – | – | 0.87 (0.70–1.09)   | – | – |                                                                                                                                                  |
|                                              |                                                                                                                                  | Vitamin C + vitamin E + β-carotene vs. placebo                      |      |     |     |     |   |   |   |   | 0.80 (0.59–1.09)   | – | – | Analysis adjusted for sex, age, race, and category, and smoking status at enrollment did not materially alter the size or direction of estimates |
|                                              |                                                                                                                                  | Vitamin C + vitamin E + β-carotene + zinc vs. placebo               |      |     |     |     |   |   |   |   | 0.72 (0.52–0.98)†† | – | – |                                                                                                                                                  |

|                                                                                                                                       |                                                              |      |   |   |      |   |   |   |   |                                |   |   |
|---------------------------------------------------------------------------------------------------------------------------------------|--------------------------------------------------------------|------|---|---|------|---|---|---|---|--------------------------------|---|---|
| Loss of visual acuity score of $\geq 15$ letters from baseline (among those in age-related macular degeneration categories 2,3, or 4) | Vitamin C + vitamin E + $\beta$ -carotene                    | 3597 | - | - | 1197 | - | - | - | - | 0.90 (0.74-1.09)               | - | - |
|                                                                                                                                       | Vitamin C + vitamin E + $\beta$ -carotene vs. placebo        |      |   |   |      |   |   |   |   | 0.88 (0.67-1.15)               | - | - |
|                                                                                                                                       | Vitamin C + vitamin E + $\beta$ -carotene + zinc vs. placebo |      |   |   |      |   |   |   |   | 0.79 (0.60-1.04) <sup>††</sup> | - | - |
| Progression to advanced age-related macular degeneration (among those in age-related macular degeneration categories 3 or 4)          | Vitamin C + vitamin E + $\beta$ -carotene                    | 2556 | - | - | 775  | - | - | - | - | 0.83 (0.66-1.06) <sup>§§</sup> | - | - |
|                                                                                                                                       | Vitamin C + vitamin E + $\beta$ -carotene vs. placebo        | 2549 | - | - | 1022 | - | - | - | - | 0.76 (0.55-1.05) <sup>††</sup> | - | - |
|                                                                                                                                       | Vitamin C + vitamin E + $\beta$ -carotene + zinc vs. placebo |      |   |   |      |   |   |   |   | 0.66 (0.47-0.91)               | - | - |
| Loss of visual acuity score of $\geq 15$ letters from baseline (among those in age-related macular degeneration categories 3 or 4)    | Vitamin C + vitamin E + $\beta$ -carotene                    |      |   |   |      |   |   |   |   | 0.86 (0.70-1.07)               | - | - |
|                                                                                                                                       | Vitamin C + vitamin E + $\beta$ -carotene vs. placebo        |      |   |   |      |   |   |   |   | 0.85 (0.63-1.14)               | - | - |

Vitamin C +  
vitamin E + β-  
carotene +  
zinc vs.  
placebo

0.73 (0.54–  
0.99)¶¶

\*\_ = not reported; AREDS = Age-related eye disease study; MONMD = Multicenter Ophthalmic and Nutritional Age-Related Macular Degeneration Study; REACT= Roche European American Cataract Trial.

†Unless otherwise specified, comparisons were made between groups receiving the combination of the listed nutrients and groups receiving combinations of placebo or nutrients other than the nutrients listed.

‡Total number was presented (when available) if the number in each comparison group was not reported.

§95% CIs are reported for the Linxian General Population Trial, and 99% CIs are reported for AREDS.

|| Difference from placebo, -0.7 logMAR ( $P = 0.03$ ).

¶| Difference from placebo, -0.62 ( $P = 0.07$ ).

\*\* Difference between groups: -1.6 ( $P = 0.05$ ).

††  $P = 0.007$ .

‡‡  $P = 0.03$ .

§§  $P = 0.05$ .

|||  $P = 0.001$ .

¶¶  $P = 0.008$ .
